# Supplementary material for: Trends in Malaria in Odisha, India—An Analysis of the 2003–2013 Time-Series Data from the National Vector Borne Disease Control Program
Source: PubMed Central journal article supplement (PMC4750863; doi:10.1371/journal.pone.0149126), 2016-02-11
Supplement: pone.0149126.s004.pdf [file pone.0149126.s004.pdf]

|    |                                                                                    |
|----|------------------------------------------------------------------------------------|
|    | <b>Name of the Districts with Annual Malaria Incidence &lt; 2 (LOW)</b>            |
| 1  | Balasore                                                                           |
| 2  | Bhadrak                                                                            |
| 3  | Kendrapara                                                                         |
| 4  | Jagatsingpur                                                                       |
| 5  | Puri                                                                               |
|    | <b>Name of the Districts with Annual Malaria Incidence 2 to &lt; 5 (MODERATE)</b>  |
| 6  | Cuttack                                                                            |
| 7  | Nayagarh                                                                           |
| 8  | Baragarh                                                                           |
|    | <b>Name of the Districts with Annual Malaria Incidence 5 to &lt; 10 (HIGH)</b>     |
| 9  | Jajpur                                                                             |
| 10 | Khurda                                                                             |
| 11 | Ganjam                                                                             |
| 12 | Jharsuguda                                                                         |
|    | <b>Name of the Districts with Annual Malaria Incidence 10 or more ( VERY HIGH)</b> |
| 13 | Mayurbhanj                                                                         |
| 14 | Keonjhar                                                                           |
| 15 | Dhenkanal                                                                          |
| 16 | Angul                                                                              |
| 17 | Deogarh                                                                            |
| 18 | Sundargarh                                                                         |
| 19 | Sambalpur                                                                          |
| 20 | Sonepur                                                                            |
| 21 | Boudh                                                                              |
| 22 | Kandhamal                                                                          |
| 23 | Bolangir                                                                           |
| 24 | Kalahandi                                                                          |
| 25 | Rayagada                                                                           |
| 26 | Koraput                                                                            |
| 27 | Gajapati                                                                           |
| 28 | Nuapada                                                                            |
| 29 | Nawarangpur                                                                        |
| 30 | Malkangiri                                                                         |
